# Supplementary material
Source: publisher site journal article supplement (https://www.dovepress.com/article/549178)
Supplement: Supplementary file 1 [file 549178%20Supplementary%20Material.docx]

**Supplementary Material: Questionnaire**

**Number：**

**Questionnaire on Children's Electronic Product Use and Health-Related Behaviors**

Dear Parents,

To further understand your child's use of electronic products and health status, so as to provide you and your child with health guidance and assistance, please fill in this questionnaire based on the actual situation of your child and yourself. There are no right or wrong answers. We will keep your information strictly confidential. Thank you for your participation!

| **A1 Basic Information** | | | |
| --- | --- | --- | --- |
| 1. Child's Name:   _________ | 02.Gender:  Male Female | | 03.Date of Birth:  ___year ___month ___day |
| 04. School:  ______________ | 05.Class：  ___Grade ___Class | | 06. Parent's Phone Number:  _______(Required) |
| 07. Father's Educational Background:  Primary School and Below  Junior High School Technical Secondary School/Senior High School  Junior College  Bachelor's Degree and Above | | | |
| 08. Mother's Educational Background:  Primary School and Below  Junior High School Technical Secondary School/Senior High School  Junior College  Bachelor's Degree and Above | | | |
| 09. Proportion of the family's average monthly food expenditure in the total monthly family consumption:  More than 59% 50%-59% 40-49% 30-39% Below 30% | | | |
| 10. Family Structure:  You, your spouse, and your child (two-generation household)  You, your spouse, your parents, and your child (three-generation household)  You, your spouse, your child, your siblings, etc. (extended household)  Single-Parent Household  Others ______________ | | | |
| **A2 Electronic Product Use (After-School Time)** | | | |
| 1. Does your child have their own electronic products?   YesPlease answer Question 02  No | | | |
| 1. Approximately how much have you spent on electronic products for your child?   1,000 RMB and Below 1,000-2,000 RMB  2,000 (inclusive)-3,000 RMB 3,000 RMB and Above | | | |
| 03. What do you do when your child asks to buy electronic products?  Satisfy the child without much thought  Consider the pros and cons before deciding  Refuse the child without much thought  Others _____________ | | | |
| 04. What electronic products do you have at home? (Multiple choices allowed)  TV/DVD  Computer (desktop, laptop)  Mobile Phone  Tablet Computer  Learning Machine  Others _____________ | | | |
| 05. At approximately what age did your child start regularly using electronic products?  Never liked using them  2 years old  3 years old  4 years old  5 years old and Above | | | |
| 06. If your child takes the initiative to ask to use electronic products, what is usually the reason?  Acquiring knowledge  Doing online homework  Searching for information  Leisure and entertainment  Social chatting | | | |
| 07. In what situations do you mostly satisfy your child's request to use electronic products?  Let the child use them whenever they want  When no one is accompanying the child  When the child cries and insists on using them  When the child performs well in other aspects (as a reward)  Others _________________ | | | |
| 08. What method do you think can effectively restrict your child's use of electronic products?  Strictly stop them; give other rewards for not using electronic products  Punish them for overusing electronic products  Spend more time accompanying the child  Tell the child about the harms of electronic products  Limit usage time  Proactively guide the child to do other things | | | |
| 09. What is your attitude towards children's use of electronic products?  As long as it does not affect health  Do not want the child to be exposed to them too much  Depends on the child's dependence level  Firmly not allowed at present | | | |
| 10. Do you think electronic products are helpful for your child's study and life?  Very helpful  Somewhat helpful  Hardly helpful  Not helpful at all | | | |
| 11. What impacts do you think using electronic products have on your child's life? (Multiple choices allowed)  Fewer friends  Decreased adaptability  Irregular daily routine  Affects parent-child communication  Decreased eyesight  Others ________ | | | |
| 12. Time your child spends using the following types of electronic products on school days (after-school time): | | | |
| A. TV/DVD:  Seldom use  Use, Duration: __________ minutes/day B. Computer:  Seldom use  Use, Duration: __________ minutes/day  C. Mobile Phone:  Seldom use  Use, Duration: __________ minutes/day  D. Tablet (pad):  Seldom use  Use, Duration: __________ minutes/day  E. Game Console:  Seldom use  Use, Duration: __________ minutes/day  F. Learning Machine:  Seldom use  Use, Duration: __________ minutes/day  G. Other types:  Seldom use  Use, Duration: __________ minutes/day | | | |
| 13. Time your child spends using the following types of electronic products on rest days (weekends): | | | |
| A. TV/DVD:  Seldom use  Use, Duration: __________ minutes/day B. Computer:  Seldom use  Use, Duration: __________ minutes/day  C. Mobile Phone:  Seldom use  Use, Duration: __________ minutes/day  D. Tablet (pad):  Seldom use  Use, Duration: __________ minutes/day  E. Game Console:  Seldom use  Use, Duration: __________ minutes/day  F. Learning Machine:  Seldom use  Use, Duration: __________ minutes/day  G. Other types:  Seldom use  Use, Duration: __________ minutes/day | | | |
| 14. Situation of your child using electronic products within one hour before bedtime:   |  | Seldom use | Less 15 minutes | 15-30 minutes | 30-60 minutes | | --- | --- | --- | --- | --- | | A. TV/DVD |  |  |  |  | | B. Computer |  |  |  |  | | C. Mobile Phone |  |  |  |  | | D. Tablet |  |  |  |  | | E. Game Console |  |  |  |  | | F. Other types______ |  |  |  |  | | | | |
| 15. What is the main purpose of your child using electronic products before bedtime?  Seldom use  Watch TV  Study  Watch videos (mobile phone, tablet, etc.)  Chat  Browse web pages  Not sure  Others _____________ | | | |
| 16. What is the distance (eye-screen distance) between your child's eyes and the screen when using the following electronic products?  A. Computer  Seldom use  Less than 40 cm  40-49 cm  50 cm and Above  B. Portable electronic products (mobile phone, pad, etc.)  Seldom use  Less than 20 cm  20-29 cm  30 cm and Above | | | |
| 17. Parents' restrictions on the child's use of electronic products:  A. Have you restricted the total daily usage time of electronic products? Yes No  B. Have you restricted the content of electronic products used? Yes No  C. Have you informed the child about the harms of overusing electronic products?  Yes No | | | |
| 18. Do you know that some apps (such as Tencent Video, iQIYI, etc.) have a Teen Mode? (Recommends educational and educational content, and filters other inappropriate content)  KnowPlease answer Question 19  Do not know | | | |
| 19. Do you turn on the Teen Mode for your child when they use electronic products?  Yes  No | | | |
| 20. Does your child's bedroom have a TV or computer?  Only TV  Only Computer  Both  Neither | | | |
| 21. Child's Situation:  A. Does the child bring electronic products to school?  Yes  No  B. Does the family have the habit of watching TV while eating?  Yes  No  C. Does the child use electronic products while eating/riding a vehicle?  Yes  No  D. Does the child use electronic products in a dark environment (after turning off the lights)?  Yes  No | | | |
| 22. Does your child have the following situations when using electronic products? | | | |
| Question | | Options | |
| A. Does usage exceed parents' expectations? | | None  Occasionally (1-3 times a month)  Sometimes (1-2 times a week)  Frequently (3-5 times a week)  Always (daily) | |
| B. Does it cause the child to go to bed late? | | None  Occasionally (1-3 times a month)  Sometimes (1-2 times a week)  Frequently (3-5 times a week)  Always (daily) | |
| C. Does it cause the child to fail to finish homework? | | None  Occasionally (1-3 times a month)  Sometimes (1-2 times a week)  Frequently (3-5 times a week)  Always (daily) | |
| D. Does it cause conflicts with teachers/parents? | | None  Occasionally (1-3 times a month)  Sometimes (1-2 times a week)  Frequently (3-5 times a week)  Always (daily) | |
| E. Does the child hide the usage from teachers/parents? | | None  Occasionally (1-3 times a month)  Sometimes (1-2 times a week)  Frequently (3-5 times a week)  Always (daily) | |
| F. Does the child feel irritable or lose temper for a period after stopping using electronic products? | | None  Occasionally (1-3 times a month)  Sometimes (1-2 times a week)  Frequently (3-5 times a week)  Always (daily) | |
| 23. Time the child's father spends using the following types of electronic products every day: | | | |
| A. TV/DVD:  Seldom use  Use, Duration: __________ minutes/day B. Computer:  Seldom use  Use, Duration: __________ minutes/day  C. Mobile Phone:  Seldom use  Use, Duration: __________ minutes/day  D. Tablet (pad):  Seldom use  Use, Duration: __________ minutes/day  E. Game Console:  Seldom use  Use, Duration: __________ minutes/day  F. Learning Machine:  Seldom use  Use, Duration: __________ minutes/day  G. Other types:  Seldom use  Use, Duration: __________ minutes/day | | | |
| 24. Time the child's mother spends using the following types of electronic products every day: | | | |
| A. TV/DVD:  Seldom use  Use, Duration: __________ minutes/day B. Computer:  Seldom use  Use, Duration: __________ minutes/day  C. Mobile Phone:  Seldom use  Use, Duration: __________ minutes/day  D. Tablet (pad):  Seldom use  Use, Duration: __________ minutes/day  E. Game Console:  Seldom use  Use, Duration: __________ minutes/day  F. Learning Machine:  Seldom use  Use, Duration: __________ minutes/day  G. Other types:  Seldom use  Use, Duration: __________ minutes/day | | | |
| **A3 Sleep Status (Past 6 Months)** | | | |
| 1. Child's sleep time on school days (weekdays):   A. What time does your child go to bed on school days? ___ hour ___ minute (24-hour format);  B. Minutes to fall asleep after going to bed: _____ minutes;  C. What time does the child wake up in the morning? ___ hour ___ minute (24-hour format); D. Minutes to get up after waking up: ________ minutes | | | |
| 2. Child's sleep time on rest days (weekends):  A. What time does your child go to bed on rest days? ___ hour ___ minute (24-hour format);  B. Minutes to fall asleep after going to bed: _____ minutes;  C. What time does the child wake up in the morning? ___ hour ___ minute (24-hour format);  D. Minutes to get up after waking up: ________ minutes | | | |
| 1. Children's Sleep Disturbance Scale (SDSC): | | | |
| Question | | Options | |
| The child is unwilling to go to bed | | None  Occasionally (less than 1-2 times a month)  Sometimes (1-2 times a month)  Frequently (3-5 times a month)  Always (daily) | |
| The child has difficulty falling asleep at night | | None  Occasionally (less than 1-2 times a month)  Sometimes (1-2 times a month)  Frequently (3-5 times a month)  Always (daily) | |
| The child feels anxious or fearful when falling asleep | | None  Occasionally (less than 1-2 times a month)  Sometimes (1-2 times a month)  Frequently (3-5 times a month)  Always (daily) | |
| The child is startled or has tics when falling asleep | | None  Occasionally (less than 1-2 times a month)  Sometimes (1-2 times a month)  Frequently (3-5 times a month)  Always (daily) | |
| The child has repetitive movements when falling asleep (e.g., frequent head shaking or bumping) | | None  Occasionally (less than 1-2 times a month)  Sometimes (1-2 times a month)  Frequently (3-5 times a month)  Always (daily) | |
| The child experiences vivid dream scenes when falling asleep | | None  Occasionally (less than 1-2 times a month)  Sometimes (1-2 times a month)  Frequently (3-5 times a month)  Always (daily) | |
| The child sweats excessively while sleeping | | None  Occasionally (less than 1-2 times a month)  Sometimes (1-2 times a month)  Frequently (3-5 times a month)  Always (daily) | |
| The child wakes up more than twice every night | | None  Occasionally (less than 1-2 times a month)  Sometimes (1-2 times a month)  Frequently (3-5 times a month)  Always (daily) | |
| The child has difficulty falling asleep again after waking up at night | | None  Occasionally (less than 1-2 times a month)  Sometimes (1-2 times a month)  Frequently (3-5 times a month)  Always (daily) | |
| After falling asleep, the child frequently has leg tics or spasms, or often changes sleeping positions or kicks off the quilt late at night | | None  Occasionally (less than 1-2 times a month)  Sometimes (1-2 times a month)  Frequently (3-5 times a month)  Always (daily) | |
| The child has difficulty breathing late at night | | None  Occasionally (less than 1-2 times a month)  Sometimes (1-2 times a month)  Frequently (3-5 times a month)  Always (daily) | |
| The child gasps for breath or stops breathing while asleep | | None  Occasionally (less than 1-2 times a month)  Sometimes (1-2 times a month)  Frequently (3-5 times a month)  Always (daily) | |
| The child snores | | None  Occasionally (less than 1-2 times a month)  Sometimes (1-2 times a month)  Frequently (3-5 times a month)  Always (daily) | |
| The child sweats excessively at night | | None  Occasionally (less than 1-2 times a month)  Sometimes (1-2 times a month)  Frequently (3-5 times a month)  Always (daily) | |
| You find the child sleepwalking | | None  Occasionally (less than 1-2 times a month)  Sometimes (1-2 times a month)  Frequently (3-5 times a month)  Always (daily) | |
| You find the child sleep talking | | None  Occasionally (less than 1-2 times a month)  Sometimes (1-2 times a month)  Frequently (3-5 times a month)  Always (daily) | |
| The child grinds teeth while sleeping | | None  Occasionally (less than 1-2 times a month)  Sometimes (1-2 times a month)  Frequently (3-5 times a month)  Always (daily) | |
| The child screams and wakes up, or you cannot wake him/her up when he/she is dazed, but cannot remember it afterwards | | None  Occasionally (less than 1-2 times a month)  Sometimes (1-2 times a month)  Frequently (3-5 times a month)  Always (daily) | |
| The child screams and wakes up or is dazed at night; it seems you cannot help him/her, but the child cannot remember it the next morning | | None  Occasionally (less than 1-2 times a month)  Sometimes (1-2 times a month)  Frequently (3-5 times a month)  Always (daily) | |
| The child often has difficulty waking up in the morning | | None  Occasionally (less than 1-2 times a month)  Sometimes (1-2 times a month)  Frequently (3-5 times a month)  Always (daily) | |
| The child feels tired after waking up in the morning | | None  Occasionally (less than 1-2 times a month)  Sometimes (1-2 times a month)  Frequently (3-5 times a month)  Always (daily) | |
| The child feels unable to move the body after waking up the next day | | None  Occasionally (less than 1-2 times a month)  Sometimes (1-2 times a month)  Frequently (3-5 times a month)  Always (daily) | |
| The child experiences daytime sleepiness | | None  Occasionally (less than 1-2 times a month)  Sometimes (1-2 times a month)  Frequently (3-5 times a month)  Always (daily) | |
| The child can fall asleep suddenly regardless of the occasion | | None  Occasionally (less than 1-2 times a month)  Sometimes (1-2 times a month)  Frequently (3-5 times a month)  Always (daily) | |
| **A4 Other Situations** | | | |
| 01. Average daily time the child's father spends accompanying the child?  More than 4 hours  2-4 (inclusive) hours  1-2 (inclusive) hours  Less than 1 hour | | | |
| 02. Average daily time the child's mother spends accompanying the child?  More than 4 hours  2-4 (inclusive) hours  1-2 (inclusive) hours  Less than 1 hour | | | |
| 03. Does the child have the habit of eating a midnight snack?  Seldom eats  Sometimes eats  Frequently eats | | | |
| 04. Daily time your child spends on paper-based homework and reading paper-based extracurricular books: ________minutes | | | |
| 05. Time your child spends on physical exercise:  Moderate to high-intensity physical exercise (such as running, dancing, rope skipping, swimming, football, basketball, badminton, tennis, mountain climbing, and other activities that cause a slight or significant increase in heart rate):  _______ days/week, with an average of ______ minutes per day | | | |
| **A5. Physical Examination (To be filled in by investigators after on-site measurement; parents do not need to fill in)** | | | |
| Height ________ cm (accurate to 0.1cm) Weight ________ kg (accurate to 0.1kg) | | | |

Survey Date: ________ year ________ month ________ day

Investigator: _________
Verifier: _________
